# Supplementary material
Source: MDPI journal article supplement (https://www.mdpi.com/2077-0472/12/3/393)
Supplement: s1 [file s1]

Archive with 2 entries (2 files):
- Supplemental figure.pdf
- Supplemental tables.xlsx
