# Supplementary material
Source: MDPI journal article supplement (https://www.mdpi.com/2077-0472/12/3/393)
Supplement: s1 [file s1 › Supplemental figure.pdf]

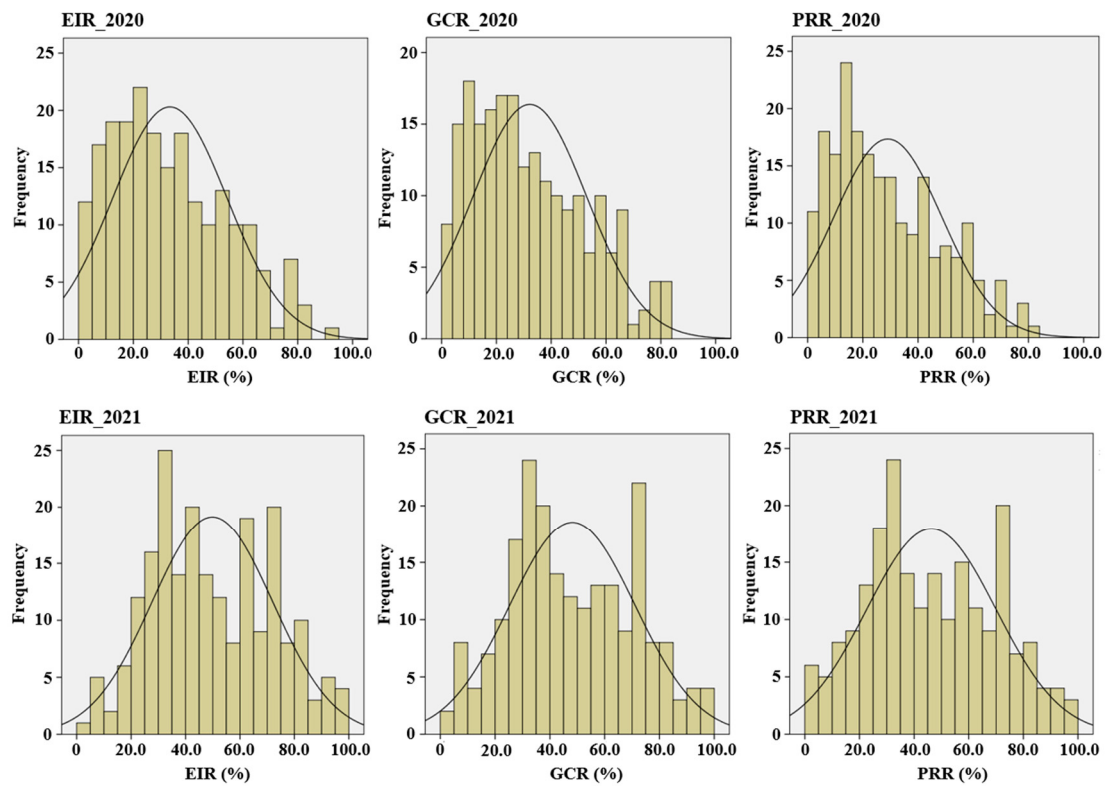

**Figure S1.** Phenotypic distributions of three somatic regeneration traits in 2020 and 2021. EIR:

embryogenic callus induction rate; GCR: green callus rate; PRR: plantlet regeneration rate.
