# Supplementary material
Source: MDPI journal article supplement (https://www.mdpi.com/2077-0472/12/3/393)
Supplement: s1 [file s1 › Supplemental tables.xlsx]

## Sheet: Table S1
Table S1. The detailed components of induction medium.
Component	Concentration (g/L)
N6 medium (including vitamins)	4
Sucrose	30
L-Proline	0.7
MES	0.5
Casein hydrolysate	0.1
2,4-D	0.002
Silver nitrate	0.0017
Powdered Agar	8
pH	5.8

## Sheet: Table S2
Table S2. The detailed components of differentiation medium.
Component	Concentration (g/L)
MS medium (including vitamins)	4.4
Sucrose	30
MES	0.5
6-BA	0.0015
IBA	0.0008
Powdered Agar	8
pH	5.8

## Sheet: Table S3
Table S3. Real-time PCR primers of the candidate genes.
Gene	Primer-F (5’- 3’)	Primer-R (5’- 3’)
Zm00001d043076 (WOX13a)	ATCTCCAACACGGGGAAG	AGCAACACGGACATCCAA
Zm00001d047879 (CLE16)	GGACGACAGCAAGAGGAAAGT	CCTCGCAATCTCGTTCACC
Zm00001d002495 (AHL23)	CCTGGAGGAGGAAGAGGCTCA	GCGGCAGGTTGAAGAACG
Zm00001d043431 (ARF11)	CGTACCCCAGTTGCTGTT	TGCCAGTCCAAGCTGTC
Zm00001d043205 (EREB147)	GGTGACGGCAAACAAGG	CTGATGAAGGCAAAAGGGA
Zm00001d028930 (MYB75)	CGACGTGGAGAGCATCTG	TGTGTTGGTGGCTTGGATT
Zm00001d049641 (GADPH)	CCCTTCATCACCACGGACTAC	AACCTTCTTGGCACCACCCT

## Sheet: Table S4
Table S4. Penotypic data of the segregating populations in 2020 and 2021.
Serial No.	EIR_2020 (%) 1	GCR_2020 (%) 2	PRR_2020 (%) 3	EIR_2021 (%)	GCR_2021 (%)	PRR_2021 (%)	EIR_AVE (%)	GCR_AVE (%)	PRR_AVE (%)
1	11.4951	11.4951	10.889	52.3265	52.3265	50.9932	31.9108	31.9108	30.9411
2	42.7418	38.9789	30.2187	30.2547	7.67159	6.12245	36.4982	23.3253	18.1706
3	76.241	76.241	76.241	74.1304	74.1304	71.9565	75.1857	75.1857	74.0988
4	26.6144	26.6144	25.9971	48.6667	48	47.3333	37.6405	37.3072	36.6652
5	37.6105	36.9439	36.9439	82.3253	77.831	75.014	59.9679	57.3874	55.9789
6	52.0425	50.7353	44.8007	28.8027	28.8027	28.8027	40.4226	39.769	36.8017
7	17.772	17.772	15.8098	27.7551	27.7551	27.7551	22.7636	22.7636	21.7824
8	4.93037	4.93037	4.93037	39.3333	37.3333	33.3333	22.1319	21.1319	19.1319
9	50.2413	50.2413	41.5276	38	38	35.3333	44.1206	44.1206	38.4305
10	30.1026	30.1026	28.7949	44.3265	43.6599	40.9796	37.2145	36.8812	34.8872
11	35.6667	33.625	31.625	27.4286	21.9048	21.9048	31.5476	27.7649	26.7649
12	67.925	67.925	55.5081	26	26	24.6667	46.9625	46.9625	40.0874
13	19.7828	17.7691	11.2768	40.5405	40.5405	40.5405	30.1616	29.1548	25.9087
14	21.6928	21.1719	19.055	31.3544	30.7008	30.0205	26.5236	25.9364	24.5378
15	17.9874	17.3585	14.9342	70	68.6667	68.6667	43.9937	43.0126	41.8005
16	25.5102	24.4898	22.449	59.0561	59.0561	53.0357	42.2832	41.773	37.7423
17	21.6284	21.6284	16.193	82.2973	82.2973	82.2973	51.9628	51.9628	49.2451
18	5.0198	2.51572	1.88679	33.7222	27.6111	27.6111	19.371	15.0634	14.749
19	21.3926	18.2109	14.3791	59.3333	59.3333	59.3333	40.363	38.7721	36.8562
20	70.0117	69.3944	68.7141	39.3333	38	38	54.6725	53.6972	53.3571
21	19.8725	17.3797	14.9101	40.6667	9.33333	8	30.2696	13.3565	11.4551
22	32.6516	31.0541	30.525	42	42	40.6667	37.3258	36.5271	35.5958
23	37.3489	36.8025	36.2974	68	68	68	52.6744	52.4012	52.1487
24	30.8948	27.1213	15.6226	61.6623	43.6033	34.5938	46.2786	35.3623	25.1082
25	42.9666	42.9666	39.2357	42.6667	42.6667	42.6667	42.8166	42.8166	40.9512
26	60.6427	60.6427	57.3015	72	72	72	66.3213	66.3213	64.6507
27	9.33727	8.69624	8.07896	15.3333	14	12.6667	12.3353	11.3481	10.3728
28	9.30674	8.66572	8.66572	28.6667	27.3333	26	18.9867	17.9995	17.3329
29	90.4866	83.5149	69.6078	43.3333	42.6667	42.6667	66.9099	63.0908	56.1373
30	21.9978	21.3805	17.7217	46	44.6667	40.6667	33.9989	33.0236	29.1942
31	2.85971	2.85971	2.11897	56	56	56	29.4299	29.4299	29.0595
32	35.5034	35.5034	30.0615	39.4694	39.4694	38.449	37.4864	37.4864	34.2552
33	60.9382	60.3209	59.8234	42.383	42.383	40.9645	51.6606	51.3519	50.3939
34	55.0208	55.0208	55.0208	72	72	72	63.5104	63.5104	63.5104
35	53.1059	53.1059	42.9408	26.4218	26.4218	25.0612	39.7638	39.7638	34.001
36	6.11929	4.05983	4.05983	25.3333	24	24	15.7263	14.0299	14.0299
37	14.7026	10.3928	9.15825	21.0853	21.0853	16.8682	17.8939	15.739	13.0132
38	52.2755	51.7627	47.93	34.6667	34.6667	32.6667	43.4711	43.2147	40.2983
39	32.2906	32.2906	28.8309	72.1212	72.1212	71.4545	52.2059	52.2059	50.1427
40	32.5786	32.5786	29.41	28.1224	28.1224	28.1224	30.3505	30.3505	28.7662
41	18.9189	18.9189	18.4211	74	74	74	46.4595	46.4595	46.2105
42	15.3192	15.3192	15.3192	72.6667	72.6667	72.6667	43.9929	43.9929	43.9929
43	5.70971	5.70971	5.08077	30	30	30	17.8549	17.8549	17.5404
44	9.42208	8.75541	8.08874	33.3333	32	28	21.3777	20.3777	18.0444
45	30.61	30.61	27.451	59.3878	58.0408	58.0408	44.9989	44.3254	42.7459
46	0	0	0	15.3333	15.3333	14	7.66667	7.66667	7
47	14.8605	14.8605	14.8605	43.3333	30.6667	24	29.0969	22.7636	19.4302
48	30.3571	30.3571	30.3571	38	38	38	34.1786	34.1786	34.1786
49	29.045	22.8175	21.0317	21.3333	19.3333	16.6667	25.1892	21.0754	18.8492
50	45.3431	45.3431	43.3824	91.3333	91.3333	91.3333	68.3382	68.3382	67.3578
51	27.0396	27.0396	21.9814	64	63.3333	56	45.5198	45.1865	38.9907
52	23.3896	23.3896	15.5655	46	46	45.3333	34.6948	34.6948	30.4494
53	12.6389	11.0069	7.36111	70	70	70	41.3194	40.5035	38.6806
54	62.3115	62.3115	49.3789	74	74	74	68.1557	68.1557	61.6895
55	31.7141	29.1804	20.9035	34.5125	31.5646	29.2971	33.1133	30.3725	25.1003
56	10.4941	10.4941	8.55034	60	60	58.6667	35.2471	35.2471	33.6085
57	23.3587	22.0052	20.7473	51.3333	51.3333	46.6667	37.346	36.6693	33.707
58	10.0353	6.45503	6.45503	18	17.3333	16.6667	14.0176	11.8942	11.5608
59	21.4286	21.4286	21.4286	21.2624	21.2624	21.2624	21.3455	21.3455	21.3455
60	7.14317	6.48958	5.19398	34.6667	34.6667	34	20.9049	20.5781	19.597
61	27.1907	26.0796	26.0796	49	49	49	38.0953	37.5398	37.5398
62	56.2983	56.2983	51.4494	57.8582	57.8582	57.8582	57.0782	57.0782	54.6538
63	7.06502	7.06502	7.06502	32	31.3333	28	19.5325	19.1992	17.5325
64	22.906	22.906	20.3867	60	59.3333	59.3333	41.453	41.1197	39.86
65	28.1221	26.048	22.4925	64	58.6667	52.8333	46.0611	42.3574	37.6629
66	38.8889	38.8889	38.2716	34	34	34	36.4444	36.4444	36.1358
67	16.8091	14.9573	12.4406	38.6667	38	36	27.7379	26.4786	24.2203
68	39.0685	39.0685	33.1161	88.445	88.445	88.445	63.7568	63.7568	60.7806
69	24.5346	23.3442	19.1342	50	50	49.3333	37.2673	36.6721	34.2338
70	57.1861	57.1861	57.1861	47.3333	47.3333	47.3333	52.2597	52.2597	52.2597
71	10.5775	8.69068	7.47856	76.6667	72	69.3333	43.6221	40.3453	38.4059
72	84.4826	82.5814	81.358	88.6667	88.6667	87.3333	86.5746	85.624	84.3457
73	8.92274	6.97946	5.13539	17.3333	12	2	13.128	9.48973	3.56769
74	10.0452	8.65633	8.65633	60.4082	60.4082	59.7415	35.2267	34.5322	34.1989
75	52.5208	48.8584	41.6888	26	26	26	39.2604	37.4292	33.8444
76	13.4615	11.5385	11.5385	65.0513	65.0513	63.0513	39.2564	38.2949	37.2949
77	53.5375	53.5375	49.2165	30.6667	30.6667	22.6667	42.1021	42.1021	35.9416
78	0	0	0	46.6667	46	45.3333	23.3333	23	22.6667
79	64.5833	64.0278	64.0278	32.1361	32.1361	32.1361	48.3597	48.0819	48.0819
80	3.05478	3.05478	3.05478	18	17.3333	16	10.5274	10.1941	9.52739
81	77.1334	77.1334	71.3221	34.6667	34.6667	34.6667	55.9	55.9	52.9944
82	25.303	25.303	25.303	63	62	62	44.1515	43.6515	43.6515
83	61.7284	61.7284	61.7284	99.3333	99.3333	99.3333	80.5309	80.5309	80.5309
84	33.4629	33.4629	24.4447	73.3333	72.6667	72	53.3981	53.0648	48.2224
85	42.289	30.5682	23.3929	13.3333	9.33333	6.66667	27.8111	19.9508	15.0298
86	53.4537	52.7734	52.1324	72.6667	72.6667	72.6667	63.0602	62.72	62.3995
87	22.589	22.589	22.589	75.3333	75.3333	75.3333	48.9612	48.9612	48.9612
88	51.2788	50.6727	50.0555	6	4.66667	4.66667	28.6394	27.6697	27.3611
89	14.1693	14.1693	12.3824	53.3333	52.6667	52.6667	33.7513	33.418	32.5246
90	40.2974	40.2974	31.5828	52.1999	52.1999	51.0371	46.2487	46.2487	41.31
91	32.8441	32.8441	31.9669	30.6667	30	30	31.7554	31.4221	30.9835
92	22.246	22.246	14.9261	39.3333	39.3333	39.3333	30.7896	30.7896	27.1297
93	30.1298	26.9228	23.7898	82	82	80.6667	56.0649	54.4614	52.2282
94	17.5945	15.763	15.763	69.3333	68.6667	68.6667	43.4639	42.2148	42.2148
95	35.1219	33.7954	32.4689	81.2109	81.2109	81.2109	58.1664	57.5031	56.8399
96	33.3553	33.3553	32.7705	54.2338	54.2338	52.9517	43.7945	43.7945	42.8611
97	36.1279	32.4355	27.5084	63.4043	62.0284	61.3617	49.7661	47.2319	44.4351
98	8.90693	5.0095	0	61.6735	61.6735	61.6735	35.2902	33.3415	30.8367
99	6.20915	5.59187	4.97458	14.6667	14.6667	14	10.4379	10.1293	9.48729
100	4	4	4	36.3265	36.3265	35.6599	20.1633	20.1633	19.8299
101	3.05275	3.05275	2.44669	59.3502	59.3502	59.3502	31.2015	31.2015	30.8984
102	60.1075	58.5166	56.0166	60	59.3333	59.3333	60.0537	58.9249	57.6749
103	17.8002	15.9596	14.7363	5.33333	5.33333	5.33333	11.5668	10.6465	10.0348
104	44.8775	42.2824	37.6811	73.0833	73.0833	73.0833	58.9804	57.6829	55.3822
105	58.5427	58.5427	53.5736	97.9728	97.9728	97.9728	78.2578	78.2578	75.7732
106	48.4947	48.4947	42.5857	75.8939	72.0921	67.982	62.1943	60.2934	55.2839
107	29.2154	28.5981	26.1835	52.6667	46.6667	39.3333	40.941	37.6324	32.7584
108	3.70497	3.70497	2.44711	22	22	12.6667	12.8525	12.8525	7.55689
109	59.0909	59.0909	59.0909	91.2925	89.932	89.2517	75.1917	74.5114	74.1713
110	36.3757	36.3757	35.7222	58.5731	57.9064	56.5731	47.4744	47.1411	46.1476
111	36	31.4321	30.1481	48.6667	48.6667	48.6667	42.3333	40.0494	39.4074
112	23.92	23.3735	23.3735	28.6667	26.6667	24	26.2933	25.0201	23.6868
113	69.814	66.9916	59.0448	92.5703	92.5703	91.8759	81.1921	79.781	75.4603
114	49.3707	48.704	41.5397	36.4444	34.8519	29	42.9076	41.7779	35.2698
115	20.4418	20.4418	19.4895	28.813	27.3527	24.559	24.6274	23.8973	22.0242
116	59.0403	59.0403	47.8305	85.5722	78.738	77.022	72.3062	68.8892	62.4262
117	35.1524	33.8191	26.7148	73	71	71	54.0762	52.4095	48.8574
118	21.335	21.335	19.595	27.1064	27.1064	20.7234	24.2207	24.2207	20.1592
119	19.2288	19.2288	19.2288	23.3333	23.3333	23.3333	21.2811	21.2811	21.2811
120	25.4219	25.4219	23.625	54.6667	54	53.3333	40.0443	39.7109	38.4792
121	66.3638	66.3638	64.6095	61.102	61.102	61.102	63.7329	63.7329	62.8558
122	12.7037	11.9285	10.473	32.6667	32.6667	30	22.6852	22.2976	20.2365
123	36.1453	36.1453	34.1453	84.9078	84.9078	82.9078	60.5266	60.5266	58.5266
124	9.60144	8.30093	7.08881	45.3901	45.3901	45.3901	27.4958	26.8455	26.2394
125	28.4966	28.4966	27.1725	96.5467	95.3562	94.8098	62.5216	61.9264	60.9911
126	20.1483	18.2252	17.5716	98	97.3333	97.3333	59.0742	57.7793	57.4525
127	60.4554	60.4554	60.4554	73.7415	73.7415	73.7415	67.0985	67.0985	67.0985
128	20.114	19.4967	16.83	39.9268	35.9646	32.0303	30.0204	27.7307	24.4302
129	17.0732	15.8537	15.8537	44.2857	38.2177	34.1905	30.6794	27.0357	25.0221
130	58.5193	57.7256	51.1211	54	54	51.3333	56.2596	55.8628	51.2272
131	9.98763	9.98763	9.98763	50.1111	49.4167	44.7222	30.0494	29.7021	27.3549
132	27.2359	24.743	17.3331	84.8889	83.4815	82.0741	56.0624	54.1123	49.7036
133	36.9658	36.1722	32.2039	62	56	56	49.4829	46.0861	44.102
134	20.3086	14.858	14.2407	48	40	24	34.1543	27.429	19.1204
135	41.0853	40.4051	34.588	62	62	59.3333	51.5427	51.2025	46.9607
136	49.3071	46.3081	40.7974	21.3333	19.3333	18.6667	35.3202	32.8207	29.7321
137	17.0584	17.0584	17.0584	21.3333	20	15.3333	19.1959	18.5292	16.1959
138	44.3431	44.3431	41.8153	69.7959	69.7959	66.449	57.0695	57.0695	54.1322
139	43.1378	40.1654	24.1061	26.6667	9.33333	9.33333	34.9022	24.7494	16.7197
140	11.7623	9.91046	7.46167	62.4354	62.4354	62.4354	37.0988	36.1729	34.9485
141	54.902	52.9412	52.9412	34.7083	34.7083	34.7083	44.8051	43.8248	43.8248
142	0	0	0	15.3333	15.3333	13.3333	7.66667	7.66667	6.66667
143	4.31264	4.31264	4.31264	24.6667	24.6667	22.6667	14.4897	14.4897	13.4897
144	10.5234	9.89443	9.29919	26.6667	26	25.3333	18.595	17.9472	17.3163
145	50.16	44.8986	38.4419	66.6667	64.6667	64	58.4133	54.7826	51.221
146	14.7226	14.1761	14.1761	26.6905	25.996	24.6349	20.7065	20.0861	19.4055
147	42	42	42	56.6667	54.6667	54.6667	49.3333	48.3333	48.3333
148	4.93997	4.93997	0	32.6667	28.6667	27.3333	18.8033	16.8033	13.6667
149	28.2261	24.148	15.0982	31.5374	26.2041	25.5374	29.8817	25.176	20.3178
150	9.17606	9.17606	9.17606	22.9384	22.2717	16.6812	16.0572	15.7239	12.9286
151	33.9386	33.9386	32.6871	78.9325	78.2659	78.2659	56.4356	56.1022	55.4765
152	26.552	25.3399	22.9149	32	32	30	29.276	28.67	26.4574
153	13.5897	13.5897	13.5897	43.6054	42.9252	41.5918	28.5976	28.2575	27.5908
154	80.1046	80.1046	72.7974	51.0116	51.0116	48.7946	65.5581	65.5581	60.796
155	55.6081	55.6081	52.4568	70	70	70	62.804	62.804	61.2284
156	75.4209	75.4209	68.0584	79	79	79	77.2104	77.2104	73.5292
157	78.7793	76.833	70.068	65.3061	65.3061	59.1837	72.0427	71.0695	64.6259
158	64.0074	64.0074	57.7304	40.6667	40.6667	40.6667	52.337	52.337	49.1985
159	48.2502	47.6946	42.8228	33.4665	32.077	32.077	40.8583	39.8858	37.4499
160	6.87662	4.20996	1.81818	4.66667	2	1.33333	5.77165	3.10498	1.57576
161	13.8353	13.8353	11.8353	54	52.6667	51.3333	33.9176	33.251	31.5843
162	17.6136	16.3636	9.20455	79.2151	73.7429	66.2707	48.4144	45.0533	37.7376
163	80	80	77.5	94.1176	94.1176	94.1176	87.0588	87.0588	85.8088
164	46.8204	46.8204	46.8204	38.2766	35.0851	31.0851	42.5485	40.9528	38.9528
165	6.48148	6.48148	6.48148	24	20.5	13.6667	15.2407	13.4907	10.0741
166	56.4615	56.4615	50	36.1769	36.1769	35.5102	46.3192	46.3192	42.7551
167	77.0703	75.7369	61.5242	84.2105	84.2105	84.2105	80.6404	79.9737	72.8674
168	76	56.2083	56.2083	80.3981	77.2534	71.1089	78.199	66.7309	63.6586
169	24.3738	24.3738	21.4062	8	5.33333	3.33333	16.1869	14.8536	12.3698
170	17.2692	17.2692	17.2692	41.3333	39.3333	36	29.3013	28.3013	26.6346
171	11.1947	9.34479	5.64507	21.3333	13.3333	12	16.264	11.3391	8.82253
172	19.4359	18.1538	17.5128	32	32	30	25.7179	25.0769	23.7564
173	30.6778	30.0606	26.3103	62.0278	61.3333	61.3333	46.3528	45.6969	43.8218
174	13.8117	13.8117	11.9344	72.6667	72.6667	72.6667	43.2392	43.2392	42.3005
175	27.6747	27.6747	26.008	60.1667	59.5	58.8333	43.9207	43.5874	42.4207
176	26.8491	25.5544	18.4878	32	31.3333	28	29.4245	28.4439	23.2439
177	12.4517	12.4517	12.4517	72	72	72	42.2259	42.2259	42.2259
178	24.1434	22.1697	14.9482	44	36	33	34.0717	29.0849	23.9741
179	64.8148	64.8148	51.8519	40.5666	39.8864	39.8864	52.6907	52.3506	45.8691
180	24.3791	19.085	16.4575	40	39.3333	38	32.1895	29.2092	27.2288
181	62.6306	62.6306	58.8319	80.5556	80.5556	80.5556	71.5931	71.5931	69.6937
182	20.0455	20.0455	16.4068	43.3333	31.3333	30	31.6894	25.6894	23.2034
183	66.0405	66.0405	61.9553	64.5957	64.5957	61.5319	65.3181	65.3181	61.7436
184	24.119	23.4901	22.1567	22.2245	19.1837	15.1429	23.1718	21.3369	18.6498
185	38.8471	35.9104	25.7838	6.18622	6.18622	4.12415	22.5167	21.0483	14.954
186	26.4881	26.4881	26.4881	45.3333	41.3333	34	35.9107	33.9107	30.244
187	39.9056	39.2996	36.9835	81.3333	80.6667	80.6667	60.6195	59.9831	58.8251
188	48.7027	47.3138	40.7814	45.1837	36.102	30.0816	46.9432	41.7079	35.4315
189	44.9694	43.0643	37.9766	42.8677	42.8677	42.8677	43.9185	42.966	40.4221
190	48.3736	40.9729	28.3987	73.3333	72.6667	72.6667	60.8534	56.8198	50.5327
191	42.0963	41.4553	41.4553	90.5556	90.5556	87.7778	66.3259	66.0054	64.6165
192	17.6797	15.0541	12.5769	41.619	38.2177	32.2177	29.6494	26.6359	22.3973
193	48.3951	47.0617	45.7284	29.3333	28.6667	26	38.8642	37.8642	35.8642
194	65.2554	65.2554	52.7749	69.3333	68	68	67.2944	66.6277	60.3874
195	48.8738	47.5661	41.6692	38	34	34	43.4369	40.7831	37.8346
196	50.7852	48.5309	44.0223	47	47	47	48.8926	47.7655	45.5111
197	9.34948	9.34948	6.3644	6.66667	5.33333	4	8.00807	7.34141	5.1822
198	38.5964	38.5964	32.2444	79.9048	79.9048	79.9048	59.2506	59.2506	56.0746
199	19.7559	19.1606	14.4483	31.7778	31.7778	28.3889	25.7668	25.4692	21.4186
200	77.7778	77.7778	77.7778	65.3333	65.3333	64	71.5556	71.5556	70.8889
201	58.4335	57.7925	56.602	36.6667	36	36	47.5501	46.8963	46.301
202	53.2794	50.7974	50.1685	44.2993	42.9524	37.5646	48.7894	46.8749	43.8665
203	36.627	36.627	36.627	78.6667	76.6667	76.6667	57.6468	56.6468	56.6468
204	27.4826	24.9099	18.9571	47.7007	45.7007	45.7007	37.5916	35.3053	32.3289
205	43.6364	42.1212	42.1212	63.3333	63.3333	63.3333	53.4848	52.7273	52.7273
206	18.1308	15.8306	15.275	60.6667	56	49.3333	39.3987	35.9153	32.3042
207	4.20202	4.20202	4.20202	73.3333	73.3333	72.6667	38.7677	38.7677	38.4343
208	35.11	33.8028	33.1492	69.3333	67.3333	65.3333	52.2217	50.5681	49.2413
209	68.9531	65.9864	61.3568	44.3878	39.3878	15.1837	56.6704	52.6871	38.2702
210	54.9183	51.5116	45.0369	72	71.3333	70	63.4592	61.4225	57.5185
211	30.8172	30.8172	30.0925	34	32	14	32.4086	31.4086	22.0463
212	18.8187	18.1777	15.0641	31.3333	29.3333	26.6667	25.076	23.7555	20.8654
213	28.4613	28.4613	28.4613	47.4444	47.4444	46.1111	37.9529	37.9529	37.2862
1 EIR: embryogenic callus induction rate. 2 GCR: green callus rate. 3 PRR: plantlet regeneration rate.

## Sheet: Table S5
Table S5. Summary of the genetic linkage maps for the F2 population.
Chromosome	Number of SNPs	Length (cM)	Density (cM/SNP)
1	85	366	4.31
2	37	226.7	6.13
3	68	289.5	2.26
4	57	251.1	4.41
5	34	182.8	5.38
6	37	169.1	4.57
7	52	202.2	3.89
8	54	226.2	4.19
9	47	208.9	4.44
10	41	197	4.8
Total	512	2319.5	4.53
